# Supplementary material
Source: publisher site journal article supplement (http://www.kjim.org/upload/media/kjim-2017-332-suppl3.pdf)
Supplement: Supplementary file 1 [file kjim-2017-332-suppl3.pdf]

**Supplementary Table 3. Annual consumption of antimicrobial agents for systemic use at surgical departments (unit: DDD/1,000 patient-days)**

|                                          | 2004     | 2005     | 2006     | 2007     | 2008     | 2009     | 2010     | 2011     | 2012   | 2013   | Total    | Coefficient for time | p value |
|------------------------------------------|----------|----------|----------|----------|----------|----------|----------|----------|--------|--------|----------|----------------------|---------|
| <b>Broad-spectrum antibiotics</b>        |          |          |          |          |          |          |          |          |        |        |          |                      |         |
| 3rd CEPs                                 | 244.60   | 298.60   | 281.41   | 269.37   | 262.91   | 266.42   | 256.29   | 213.70   | 207.33 | 208.46 | 253.04   | -0.685               | < 0.001 |
| 4th CEPs                                 | 6.92     | 5.23     | 1.45     | 2.54     | 4.71     | 5.98     | 7.26     | 6.75     | 12.34  | 8.21   | 5.97     | 0.053                | < 0.001 |
| BL/BLIs                                  | 117.02   | 109.34   | 106.38   | 92.66    | 118.11   | 121.39   | 103.15   | 121.66   | 107.25 | 120.80 | 111.47   | 0.057                | 0.246   |
| FQs                                      | 135.66   | 102.20   | 97.95    | 81.26    | 72.50    | 83.96    | 69.71    | 79.70    | 76.21  | 87.92  | 89.73    | -0.364               | < 0.001 |
| Subtotal                                 | 504.20   | 515.36   | 487.18   | 445.83   | 458.23   | 477.75   | 436.41   | 421.80   | 403.13 | 425.39 | 460.21   | -0.939               | < 0.001 |
| <b>Antibiotics against MDR pathogens</b> |          |          |          |          |          |          |          |          |        |        |          |                      |         |
| Carbapenems                              | 0.79     | 3.69     | 7.79     | 4.92     | 5.76     | 5.89     | 5.30     | 5.63     | 5.08   | 8.64   | 5.27     | 0.037                | < 0.001 |
| Glycopeptides                            | 23.25    | 20.92    | 24.60    | 18.47    | 22.97    | 23.27    | 27.55    | 21.71    | 25.50  | 31.88  | 23.83    | 0.069                | 0.001   |
| Oxazolidinone                            | 0.00     | 0.40     | 0.11     | 0.47     | 0.49     | 0.86     | 1.66     | 1.33     | 2.24   | 2.34   | 0.92     | 0.022                | < 0.001 |
| Polymyxin                                | 0        | 0.04     | 0        | 3.88     | 3.60     | 0.70     | 1.37     | 1.81     | 0.67   | 0.92   | 1.28     | 0.005                | 0.407   |
| Tigecycline                              | 0        | 0        | 0        | 0        | 0        | 0.65     | 0.98     | 0.01     | 0.91   | 2.33   | 0.45     | 0.015                | < 0.001 |
| Subtotal                                 | 24.04    | 25.05    | 32.50    | 27.74    | 32.82    | 31.37    | 36.86    | 30.49    | 34.39  | 46.11  | 31.75    | 0.149                | < 0.001 |
| <b>Nonbroad-spectrum antibiotics</b>     |          |          |          |          |          |          |          |          |        |        |          |                      |         |
| 1st CEPs                                 | 261.60   | 208.76   | 248.00   | 335.40   | 277.11   | 259.23   | 251.23   | 259.30   | 240.44 | 202.87 | 255.23   | -0.298               | 0.015   |
| 2nd CEPs                                 | 271.32   | 306.30   | 255.95   | 219.02   | 185.53   | 167.19   | 169.46   | 156.00   | 161.91 | 172.48 | 210.54   | -1.287               | < 0.001 |
| AGs                                      | 266.55   | 242.53   | 225.34   | 201.33   | 133.30   | 96.02    | 68.49    | 51.71    | 47.39  | 37.98  | 144.44   | -2.386               | < 0.001 |
| Lincosamides                             | 2.65     | 2.76     | 4.76     | 3.99     | 4.16     | 4.50     | 3.51     | 4.72     | 4.64   | 6.88   | 4.19     | 0.027                | < 0.001 |
| Macrolides                               | 13.34    | 15.95    | 16.10    | 9.33     | 15.54    | 13.58    | 12.13    | 28.15    | 11.45  | 11.07  | 14.57    | 0.005                | 0.833   |
| Metronidazole                            | 49.39    | 60.27    | 62.42    | 56.65    | 56.15    | 42.11    | 39.65    | 39.24    | 37.93  | 29.57  | 48.19    | -0.256               | < 0.001 |
| Monobactam                               | 3.46     | 2.35     | 1.23     | 1.31     | 1.56     | 0.17     | 0        | 0        | 0      | 0      | 1.09     | -0.030               | < 0.001 |
| Penicillins                              | 22.78    | 18.01    | 14.88    | 13.80    | 12.18    | 6.76     | 11.17    | 16.58    | 20.71  | 20.93  | 15.79    | -0.003               | 0.890   |
| Tetracyclines                            | 4.15     | 8.98     | 2.95     | 2.69     | 1.05     | 0.00     | 0.37     | 0.57     | 3.54   | 5.58   | 3.07     | -0.024               | 0.028   |
| SXT                                      | 12.71    | 7.56     | 9.73     | 18.15    | 30.35    | 13.24    | 17.56    | 19.20    | 20.18  | 18.93  | 16.48    | 0.090                | 0.002   |
| Subtotal                                 | 907.97   | 873.47   | 841.37   | 861.67   | 716.92   | 602.80   | 573.56   | 575.47   | 548.20 | 506.29 | 713.60   | -4.163               | < 0.001 |
| Total                                    | 1,436.20 | 1,413.88 | 1,361.05 | 1,335.24 | 1,207.97 | 1,111.93 | 1,046.84 | 1,027.76 | 985.73 | 977.78 | 1,205.57 | -4.953               | < 0.001 |

Coefficient for time and p value were extracted from a linear regression model using measures on a monthly basis.

DDD, defined daily dose; CEP, cephalosporin; BL,  $\beta$ -lactam; BLI,  $\beta$ -lactamase inhibitor; FQ, fluoroquinolone; MDR, multidrug-resistant; AG, aminoglycoside; SXT, trimethoprim/sulfamethoxazole.
